1 **Title:** Remodelling of pSK1 Family Plasmids and Enhanced Chlorhexidine Tolerance in  
2 Methicillin-Resistant *Staphylococcus aureus*

3 **Running Title:** Evolutionary Dynamics of pSK1

4 **Authors:** Sarah L Baines<sup>1#</sup>, Slade O Jensen<sup>2</sup>, Neville Firth<sup>3</sup>, Anders Gonçalves da Silva<sup>4</sup>, Torsten  
5 Seemann<sup>5</sup>, Glen Carter<sup>4</sup>, Deborah A. Williamson<sup>4</sup>, Benjamin P Howden<sup>4,5,6##</sup>, Timothy P  
6 Stinear<sup>1,5\*</sup>

7 \* Joint senior authors, # Corresponding authors

8 **Affiliations:**

9 <sup>1</sup>Department of Microbiology & Immunology, The University of Melbourne at The Peter Doherty  
10 Institute for Infection and Immunity, Victoria, Australia

11 <sup>2</sup>Microbiology and Infectious Diseases, School of Medicine, Ingham Institute for Applied Medical  
12 Research, University of Western Sydney, New South Wales, Australia

13 <sup>3</sup>School of Life and Environmental Sciences, University of Sydney, New South Wales, Australia

14 <sup>4</sup>Microbiological Diagnostic Unit Public Health Laboratory, Department of Microbiology &  
15 Immunology, The University of Melbourne at The Peter Doherty Institute for Infection and  
16 Immunity, Victoria, Australia

17 <sup>5</sup>Doherty Applied Microbial Genomics, Department of Microbiology & Immunology, The  
18 University of Melbourne at The Peter Doherty Institute for Infection and Immunity, Victoria,  
19 Australia

20 <sup>6</sup>Infectious Diseases Department, Austin Health, Victoria, Australia

21

22 **Word Count:** Abstract (241), Importance (144), Main Text (5,216)

23 **Corresponding authors:**

24 Sarah Baines: bainess@unimelb.edu.au

25 Benjamin Howden: bhowden@unimelb.edu.au

26 **Abstract**

27 *Staphylococcus aureus* is a significant human pathogen whose evolution and adaptation has been  
28 shaped in part by mobile genetic elements (MGEs), facilitating global spread of extensive  
29 antimicrobial resistance. However, our understanding of the evolutionary dynamics surrounding  
30 MGEs is incomplete, in particular how changes in the structure of multidrug-resistant (MDR)  
31 plasmids may influence important staphylococcal phenotypes. Here, we undertook a population-  
32 and functional-genomics study of 212 methicillin-resistant *S. aureus* (MRSA) ST239 isolates  
33 collected over 32 years to explore the evolution of the pSK1 family of MDR plasmids, illustrating  
34 how these plasmids have co-evolved with and contributed to the successful adaptation of this  
35 persistent MRSA lineage. Using complete genomes and temporal phylogenomics we reconstructed  
36 the evolution of the pSK1 family lineage from its emergence in the late 1970s, with multiple  
37 structural variants arising. Plasmid maintenance and stability was linked to IS256- and IS257-  
38 mediated chromosomal integration and disruption of plasmid replication machinery. Overlaying  
39 genomic comparisons with phenotypic susceptibility data for gentamicin and chlorhexidine, it  
40 appeared that pSK1 has contributed to enhanced resistance in ST239 MRSA through two  
41 mechanisms: (i) acquisition of plasmid-borne resistance mechanisms increasing rates of  
42 gentamicin resistance and reduced chlorhexidine susceptibility, and (ii) changes in plasmid  
43 configuration linked with further enhancement of chlorhexidine tolerance. While the exact  
44 mechanism of enhanced tolerance remains elusive, this research has uncovered a clear  
45 evolutionary response of ST239 MRSA to chlorhexidine, one which may contribute to the ongoing  
46 persistence and adaptation of this lineage within healthcare institutions.

## 47 **Importance**

48 The biocide chlorhexidine is fundamental to infection control practices which prevent nosocomial  
49 infection and it is highly effective for decolonisation of *S. aureus* from human skin. There have  
50 been increasing reports of staphylococcal populations evolving tolerance to chlorhexidine,  
51 suggesting that the increasing use and reliance on this biocide may provide a significant selection  
52 pressure influencing the evolution of staphylococcal populations. Chlorhexidine tolerance in  
53 *S. aureus* is commonly enabled by the acquisition of an efflux pump, however alternative  
54 mechanisms influencing tolerance are poorly understood. In this study we demonstrate a  
55 previously unrecognised phenomenon, plasmid structural remodelling, by which *S. aureus* may  
56 developed enhanced chlorhexidine tolerance. Further, we highlight the importance of undertaking  
57 a detailed exploration of the evolutionary dynamics surrounding mobile genetic elements, which  
58 contribute immensely to the evolution of microbial species and provide here a framework for how  
59 such an analysis can be performed.

## 60 **Introduction**

61 Mobile genetic elements (MGEs) play a central role in microbial evolution; serving as a  
62 mechanism by which genetic material can be transferred, disseminated and rearranged, allowing  
63 for rapid adaptation to new and changing environments. Nowhere is this more apparent than in the  
64 global dissemination of genes encoding mechanisms of antimicrobial resistance and virulence in  
65 populations of clinically significant bacteria [1-4]. *Staphylococcus aureus* is a leading cause of  
66 bacterial infections in humans and invasive staphylococcal disease is associated with significant  
67 morbidity and mortality [5, 6]. One of the oldest and truly pandemic lineage of *S. aureus* is multi-  
68 locus sequence type (ST) 239; a multidrug-resistant, healthcare associated (HA) methicillin-  
69 resistant *S. aureus* (MRSA) clone first identified in the late 1970s [7-9]. Multiple studies have used  
70 genomics to explore the evolution of ST239 MRSA, revealing mechanisms which have contributed  
71 to its global spread, extensive antimicrobial resistance repertoire, and persistence in healthcare  
72 environments [10-15]. In Australia, ST239 has been the dominant HA-MRSA lineage for nearly  
73 four decades (national surveillance reports: <http://agargroup.org.au/agar-surveys/>). Although its  
74 prevalence is declining in the regions, having recently been surpassed by the epidemic EMRSA-  
75 15 (ST22) clone [16], ST239 is still regularly recovered as a cause of invasive disease in multiple  
76 Australian states [17]. We have previously described the long-term evolution of ST239 MRSA in  
77 Eastern-Australian hospitals, one of convergent and adaptive evolution of two genetically distinct  
78 ST239 clades towards increased antimicrobial resistance at the cost of attenuated virulence [15].  
79 This initial work largely focused on changes occurring within conserved regions of the genome  
80 with limited exploration of the accessory genome that is primarily composed of MGEs.

81 Early ST239 MRSA were first recognised in Australia because they displayed resistance to  
82 gentamicin [18-20], encoded for by a bifunctional acetyltransferase-phosphotransferase gene

83 *aac(6')-aph(2'')* commonly carried on pSK1-like plasmids as part of the composite transposon  
84 (Tn)4001 [21, 22]. The focus of multiple studies, pSK1 represents a family of intermediate sized  
85 (20-40 kb), theta-replicating staphylococcal plasmids that have been recovered in Australia and  
86 the United Kingdom [21, 23-26]. Multiple antibiotic resistance mechanisms are variably encoded  
87 for on pSK1-like plasmids. In addition to *aac(6')-aph(2'')*, resistance to penicillinase-labile  
88 penicillins is encoded for by *blaZ* as part of Tn552 [24, 25], and trimethoprim resistance is  
89 mediated by an insensitive dihydrofolate reductase (*dfr*), encoded by *dfrA* and carried as part of  
90 Tn4003 which represents a cointegrated remnant of a pSK639-like plasmid [27, 28]. Additionally,  
91 harboured by pSK1-like plasmids is a *qacA* gene encoding a quaternary ammonium compound  
92 (QAC) multidrug-efflux pump [29], which can mediate tolerance to cationic biocides, most notably  
93 chlorhexidine [30]. The presence of a plasmid-borne *qacA* gene, and predicted biocide tolerance,  
94 has previously been attributed to an outbreak of ST239 MRSA in the United Kingdom in the early  
95 2000s [31, 32].

96 The divalent cationic biocide chlorhexidine digluconate (CHX) was first described in 1954 and is  
97 a fundamental component of infection control practices to prevent nosocomial infections [33, 34].  
98 It is one of the most widely used antiseptic agents because of its broad spectrum of activity against  
99 bacteria, fungi, and enveloped viruses, as well as its good safety record and general tolerability  
100 [35-37]. Resistance at in-use concentrations, typically a 0.2 to 4.0% CHX solution in water, has  
101 not been reported in *S. aureus*, however the phenomena of enhanced tolerance appears to be  
102 increasingly common [38, 39], and is reviewed in [40]. CHX tolerance, defined here as an increase  
103 in the minimum inhibitory concentration (MIC) and/or minimum bactericidal concentration  
104 (MBC) to a level that remains below in-use concentrations, has been associated with the  
105 acquisition or mutation of cationic biocide active efflux pumps, the most commonly reported being

106 the QAC efflux systems [30, 41, 42]. Most reports of staphylococcal populations evolving CHX  
107 tolerance demonstrated either a phenotypic shift in MIC/MBC or detected an increase in the  
108 prevalence of genes encoding efflux systems [40, 43]. In *S. aureus* this is mainly associated with  
109 *qacA*, often referred to as to *qacA/B* as the encoded peptides differs by only a single amino acid  
110 [30, 40, 44]. It is important to note that acquisition of a *qac* gene does not consistently lead to  
111 phenotypic tolerance, nor is an increase in CHX tolerance invariably associated with an efflux  
112 system [40, 45, 46]. Subsequently, shifts in the prevalence of *qac* genes in staphylococcal  
113 populations may not correspond with the development of CHX tolerance. While several studies do  
114 combine phenotypic and molecular data, this work has largely been performed on clonally-diverse  
115 or genomically-undefined populations, and thus the evolutionary mechanisms responsible are  
116 often unclear [38, 43].

117 Here we present a detailed exploration of the evolutionary dynamics surrounding the pSK1 family  
118 of plasmids, focusing on a single well-defined staphylococcal lineage, the ST239 MRSA  
119 population circulating in Australia. The primary aims of this work were to: (i) identify and  
120 understand the mechanisms of adaptation with a specific focus on changes in the structural  
121 configuration of pSK1-like plasmids, and (ii) explore the phenotypic consequences of these  
122 changes in ST239 MRSA, with particular interest in the development of enhanced CHX tolerance.

## 123 **Results and Discussion**

124 In Australia, the ST239 MRSA population is composed of two genetically distinct clades [15]. The  
125 oldest clade is largely restricted to Australia and represents the original lineage circulating in the  
126 region. Conversely, the newer clade represents an intercontinental transmission event, introducing  
127 the lineage circulating in South East Asia into Australia, a more recent estimate placing this event  
128 in the late 1990s (Figure S1). These ST239 clades were originally referred to as Clade 1 and Clade  
129 2 [15], however in this publication we have renamed them as the Australian clade (original) and  
130 the Asian-Australian clade (introduced), respectively.

131 Plasmids related to pSK1 were first identified in ST239 MRSA circulating in Australia in the early  
132 1980s [21, 23, 24]. An *in silico* examination of contemporary isolates revealed that pSK1-like  
133 plasmids are still maintained in this population (Figure S1), suggesting the extended co-evolution  
134 of pSK1-like plasmids and ST239 MRSA and hence prolonged exposure to the highly selective  
135 healthcare environment. To explore the evolutionary dynamics surrounding the pSK1 family we  
136 undertook a detailed phenotypic and comparative genomic analysis of 212 temporally (1980 to  
137 2012) and geographically diverse Australian ST239 MRSA. To aid in understanding the changes  
138 in plasmid configuration which are described in this publication the structure of the family  
139 prototype, pSK1, is illustrated in Figure 1A and described in the Supplementary Results.

140

### 141 *Prevalence and Structural Variability of pSK1 Family Plasmids*

142 To identify pSK1-like plasmids, the presence and synteny of plasmid genes was assessed *in silico*.  
143 This analysis found that pSK1-like plasmids were solely carried by isolates belonging to the  
144 Australian clade, present in 92/124 isolates (74.1%). A comparison of plasmid carriage with year



145 of isolation illustrated that the prevalence of pSK1-like plasmids had increased over time (Figure  
146 1B), suggesting an evolutionary benefit for their acquisition and maintenance in this population.  
147 There was no evidence of plasmid sharing between the Australian and Asian-Australian clades  
148 (Figure 2). However, this finding was not surprising due to the geographic separation of the two  
149 clades; the Australian clade has been predominantly recovered in the states of New South Wales  
150 and Queensland since the early 2000s, and the newer Asian-Australian clade has almost  
151 exclusively been recovered in Victoria since its introduction [15] (Figure 2A).

152 A closer examination of the 92 isolates in which a pSK1-like plasmid was identified showed  
153 considerable variation in the presence of plasmid genes (Figure 2B). When aligned to a model for  
154 the ST239 population structure it became apparent that the variation observed was  
155 phylogenetically correlated and suggested the emergence or acquisition of a limited number of  
156 pSK1-like structural variants (SVs), with subsequent clonal expansion. Six broad gene patterns  
157 (GP) could be resolved amongst these data (Figure 2B, Supplementary Results). Differences  
158 between the GPs correlated with the variable presence of the composite transposons in pSK1. For  
159 example, the absence of *Tn4003* in GP3 and GP4 (Figure 2B). Additionally, the loss of three to  
160 six syntenic genes in the plasmid backbone, including the replication initiation protein (*repA*) and  
161 the plasmid partitioning (*par*) genes (observed in GP2, GP4 and GP6, Figure 2B). This finding  
162 suggested that some of the pSK1-like SVs may be chromosomally integrated. Examination of the  
163 pSK1 gene presence and synteny in the Asian-Australian clade revealed that 5/6 syntenic genes  
164 associated with pSK1 region 4 (including *qacAR*) were highly prevalent (Figure 2B). These  
165 isolates were found to carry an alternative *qacA*-containing plasmid, specifically a pTW20\_1-like  
166 plasmid [31]. Unlike pSK1, the pTW20\_1-like gene structure appeared to be largely conserved. A  
167 description of this second plasmid population is provided in the Supplementary Results.

168

169 *Structural Variants of pSK1*

170 To explore the extent of structural remodelling (defined here as changes in plasmid gene content  
171 and/or configuration) that has occurred in the pSK1-like plasmid population, long-read sequencing  
172 was conducted to establish a reference sequence for the six expected SVs. Additionally, the  
173 genome assemblies of all isolates were mined for unique plasmids features, used to determine the  
174 prevalence of each SV in the wider ST239 population. This work has been summarised below. For  
175 a more detailed explanation refer to the Supplementary Results.

176 Using this approach eight distinct pSK1-like plasmids were identified, having arisen largely  
177 through the activities of IS256 and/or IS257. These changes can be classified into three categories.  
178 The first was IS-mediated gain or loss of the composite transposons Tn4001 and Tn4003. This was  
179 observed in three SVs, termed SV1, SV3 and SV4 (representing GP1, GP3, and GP4, respectively).  
180 SV1 was found to lack the aminoglycoside resistance conferring Tn4001 and is structurally  
181 equivalent to the previously identified pSK7 (Figure 3A) [24, 47]. With only a single copy of the  
182 IS256 target site duplications (TSD) that flank Tn4001 in pSK1 identified, it was unclear whether  
183 SV1 had lost Tn4001 or had never acquired it. Given when the isolates in which SV1 were  
184 recovered (1980 and 1982) and their location close to the tree root in a time-aware phylogenetic  
185 model for the Australian clade (Figure S2), SV1 likely represented a progenitor of pSK1 prior to  
186 gaining Tn4001. Both SV3 and SV4 were found to lack Tn4003 (Figure 3A,3B). Instead they  
187 contained only a single copy of IS257 with the same TSD that flanked this region in pSK1, in a  
188 configuration equivalent to that of pSK14 [24, 47]. Unlike SV1, the phylogenetic location of  
189 isolates carrying SV3 and SV4 strongly supported deletion of Tn4003 (Figure S2), potentially  
190 through homologous recombination between the flanking IS257s rather than historic absence. This

191 notion is consistent with the proposed evolution of Tn4003, which through IS257-mediated  
192 transposition from a pSK639-like plasmid was acquired into a pSK1-like precursor to generate the  
193 plasmid cointegrate [28].

194 The second category was IS-mediated chromosomal integration and disruption of the plasmid  
195 replication machinery, through IS- and non-IS-mediated deletions/exclusion events. Chromosomal  
196 integration was observed in five pSK1-like SVs. Genomic island SV2 (representing GP2) emerged  
197 from IS256-mediated integration of pSK1 adjacent to the staphylococcal accessory regulator A  
198 (*sarA*) gene (Figure 3B). Likewise, SV4 (representing GP4) emerged from IS256-mediated  
199 integration of SV3 adjacent to a predicted aerobactin biosynthesis gene and in close proximity to  
200 an alanine racemase (*alr*) gene (Figure 3B). In both cases, integration was likely preceded by an  
201 IS256 transposition event, resulting in the addition of an extra IS256 within each plasmid  
202 precursor. Interaction between the novel and native IS256 copies led to the formation of circular  
203 intermediates, with each composite Tn encompassing the majority of the plasmid sequence but  
204 excluding a segment of the plasmid backbone, resulting in the loss of six and three syntenic CDS  
205 in SV2 and SV4, respectively. The three remaining SVs had all arisen from a single IS257-  
206 mediated chromosomal integration event. Only SV5 and SV6 were represented in the complete  
207 genomes; a hypothesised structure has been proposed for the other SV, termed SV5' as it  
208 represented the progenitor for both SV5 and SV6 (Figure 3B & 3C). In this case, chromosomal  
209 integration of pSK1 had occurred 9.2 kb upstream of a disrupted  $\beta$ -haemolysin gene (disruption  
210 resulting from integration of prophage Sa3) and likely involved IS257-mediated replicative  
211 transposition (for integration) and homologous recombination to account for the partial deletion of  
212 Tn4003. Genomic island SV5 had an additional 45 bp deletion in *repA* (Figure 3C), and SV6 had  
213 a deletion of six syntenic CDS from the plasmid backbone likely resulting from IS256-mediated

214 homologous recombination (Figure 3B). All deletion events invariably resulted in the loss of  
215 genes, or predicted loss of function of the plasmid replication machinery, which has a known role  
216 in stabilising newly integrated elements by removing any interference with chromosomal  
217 replication [48].

218 The third category represented two IS-mediated inversion events. The first was an IS257-mediated  
219 inversion of SV5', giving rise to genomic island SV5 (Figure 3C). This appears to be the result of  
220 intramolecular replicative transposition in the inverse orientation and resulted in the inversion of  
221 a 42.7 kb region [4]. This has reversed the orientation of all SV5 CDS and split  $\phi$ Sa3 (Figure 3C).  
222 A second smaller IS256-mediated inversion event was identified in SV3. Transposition of IS256  
223 followed by homologous recombination between the new and a native IS256 copy (in inverted  
224 orientation) has led to a 3.5 kb inversion in the plasmid backbone and reversed the orientation of  
225 *repA*, *par* and a hypothetical CDS (Figure 3A). Further, this is the same region deleted in SV4.  
226 While the exact consequences of these inversions are unknown the division and partial inversion  
227 of  $\phi$ Sa3 should prevent excision of the prophage.

228

### 229 *Convergent Evolution of pSK1-like Variants*

230 Analysis of unique plasmid features in the short-read *de novo* assemblies enabled assignment of  
231 all isolates harbouring a pSK1-like plasmid to one of the eight SVs and resolved all inconsistencies  
232 between the phylogenetic population model and the originally identified GPs (Supplementary  
233 Results). This finding strongly suggested that once a novel pSK1-like plasmid emerged it was  
234 maintained and structurally remodelled during clonal expansion, but rarely if ever horizontally  
235 transferred between ST239 isolates. To explore potential evolutionary patterns in the plasmid

236 population, the SVs were overlaid on to a Bayesian-inferred time-aware phylogenetic model for  
237 the Australian clade (Figure S2).

238 The first pSK1-like plasmids to have appeared in the Australian ST239 clade were SV1 and pSK1,  
239 in the late 1970s, consistent with the first identified gentamicin-resistant MRSA in Australia [18-  
240 20]. From this model it was estimated that pSK1 emerged in 1979 (95% highest posterior density  
241 interval [HPDI]: 1978 - 1980), following the likely acquisition of *Tn4001* into the ancestral SV1  
242 plasmid. In the following three decades there was the emergence of SV3 around 1991 (HPDI: 1989  
243 – 1994), in which *Tn4003* had been deleted and the replication machinery inverted. There had been  
244 at least three independent chromosomal integration events, resulting in the emergence of SV2  
245 around 1985 (HPDI: 1983 – 1986), SV5' around 1994 (HPDI: 1991 – 1996), and SV4 around 2000  
246 (HPDI: 1996 – 2004). These events likely involved pSK1 as the ancestral plasmid, or SV3 as the  
247 immediate ancestor of SV4. Inversion of SV5' in 1999 (HPDI: 1997 – 2002) led to the emergence  
248 of SV5. In each integrated variant, the replication machinery had been disrupted through IS256-  
249 associated gene loss or an internal *repA* deletion. It was originally reported that region 1 was  
250 conserved in all pSK1 family plasmids [47], and for the novel extra-chromosomal SVs reported in  
251 this study this remains true. However, in the chromosomally integrated SVs only a ~9.3 kb segment  
252 of the region is conserved, demonstrating > 95% nucleotide sequence identity with *S. warneri*  
253 plasmid pPI-1 (accession AB125341.3) [47, 49]. The genes encompassed within this region encode  
254 protein products predicted to be cell-envelope associated, involved in membrane transport and  
255 potentially iron acquisition, with one gene encoding a putative Fst-like toxin as part of a Type I  
256 toxin-antitoxin system [47]. The near ubiquitous conservation of this region in the pSK1-like  
257 plasmid population suggests that these encoded products beneficial and possibly contributing to  
258 plasmid maintenance [47].

259 In addition to the clear stepwise evolution of the pSK1-like population, there also appeared to be  
260 evidence of convergent evolution. The three integration events have all occurred independently.  
261 Examination of the *de novo* assemblies for all 92 isolates harbouring a pSK1-like plasmid  
262 identified a further two independent deletion events amongst the SV5' and SV5 clade (Figure S2).  
263 These findings strongly suggested that the emergence of these phylogenetically distinct but  
264 structurally similar SVs is the result of a significant but unknown evolutionary pressure acting on  
265 this pSK1-like population. There is a clear role for chromosomal integration in improving the  
266 maintenance of plasmid genes in a population, and the subsequent deletion or disruption of the  
267 plasmid replication machinery is needed for stability of the integrant [48]. In the Australian clade,  
268 almost all isolates (75/77) that have descended from an ancestral genome with an integrated pSK1-  
269 like structure have maintained it (Figure S2). It is plausible that the introduction and/or increased  
270 use of antimicrobial agents and disinfectants, specifically those for which mechanisms of  
271 resistance or tolerance are encoded for by genes harboured on pSK1, could also be contributing to  
272 the evolutionary pressure promoting plasmid maintenance and driving chromosomal integration.

273

#### 274 *Evolving Antimicrobial Resistance and Disinfectant Tolerance*

275 To explore the impact of pSK1 family evolution on antimicrobial resistance and disinfectant  
276 tolerance, 211 isolates underwent susceptibility testing against gentamicin, trimethoprim and  
277 chlorhexidine. Isolates representing both the Australian and Asia-Australian clades were tested to  
278 enable comparisons between the two populations and discern which trends may be associated with  
279 plasmid evolution.

280 ***Trimethoprim.*** Phenotypic resistance to trimethoprim was detected in all 211 ST239 isolates, with  
281 a MIC of > 32 mg/L (Table 1). Genotypically, 75/123 isolates (61.0%) of the Australian clade and

282 all 88 isolates of the Asian-Australian clade were found to harbour a mutated or acquired *dfr* gene,  
283 the *dfrA* harboured by pSK1-like plasmids or *dfrG* respectively (Table 1). A likely mechanism of  
284 resistance could not be identified in the remaining 48 isolates from the Australian clade. The lack  
285 of phenotypic variation indicated that structural variation in the plasmid population, involving the  
286 deletion or alteration of Tn4003, had not impacted on trimethoprim resistance in ST239 due to an  
287 unidentified genotypic redundancy. Subsequently, trimethoprim is unlikely to be acting as a  
288 significant driver of evolution in this population.

289 **Gentamicin.** Phenotypic resistance to gentamicin was detected in 185 (87.7%) isolates (Table 1).  
290 Three acquired genes encoding aminoglycoside modifying enzymes (AME) were identified [50]:  
291 (1) the bifunctional *aac(6')-aph(2'')*, found in Tn4001 and other chromosomal and phage locations  
292 [51-53]; (2) an adenylyltransferase gene (*aadD*, also known as ANT(4')-Ia) [54, 55]; (3) a  
293 phosphotransferase gene (*aph(3')-IIIa*) [56], which has been found co-located with  
294 *aac(6')-aph(2'')* in  $\phi$ SP $\beta$ -like in ST239 *S. aureus* TW20 [31], an isolate closely related to the  
295 Asian-Australian clade [15]. The bifunctional AME was common amongst both the Australian and  
296 Asian-Australian clades, identified in 98 (79.7%) and 82 (93.2%) isolates, respectively.  
297 Conversely, the distribution genes encoding the monofunctional AMEs were more distinct (Table  
298 1). Phenotypically the Asian-Australian clade demonstrated a significant higher average MIC to  
299 gentamicin compared to the Australian clade ( $p < 0.0001$ , Table S1). However, as most isolates  
300 harboured multiple AMEs, phenotypic resistance could not be attributed to a single gene. That  
301 being said, the distribution of these genes suggested that *aph(3')-IIIa* is likely responsible for the  
302 high level resistance observed in the Asian-Australian clade, with *aac(6')-aph(2'')* and *aadD*  
303 contributing only low level resistance in the Australian clade (Table S1).

304 To assess the impact of pSK1 evolution on gentamicin MIC, the phenotypic data was investigated  
305 for temporal trends. These analyses suggested a trend of increasing gentamicin MIC overtime.  
306 However, this was only observed in the Australian clade and not the Asian-Australian clade when  
307 modelled separately (Figure S3). This finding is consistent with what has been previously observed  
308 in ST239 MRSA with the glycopeptides and daptomycin, hypothesised to be the result of two  
309 evolutionary phenomena: (i) the introduction of the more resistant Asian-Australian clade into the  
310 region with successful local expansion and (ii) adaptive evolution within the Australian clade,  
311 collectively shifting the phenotype of the population overtime [15]. These same phenomena have  
312 likely contributed to the shift in gentamicin MIC. The Asian-Australian clade had already  
313 developed high level gentamicin resistance prior to arriving in Australia, through the acquisition  
314 of  $\phi$ SP $\beta$ -like carrying both *aac(6')-aph(2'')* and *aph(3')-IIIa*. Concurrently, the Australian clade  
315 had undergone adaptive evolution, with the acquisition of *aac(6')-aph(2'')* and/or *aadD*  
316 contributing to a significant increase in MIC (Table S1); the uptake of pSK1 serving as one  
317 mechanism by which *aac(6')-aph(2'')* could be acquired. However, plasmid evolution, with the  
318 emergence of the pSK1-like variants, appeared to have no effect on gentamicin MIC, with no  
319 temporal trend having been detected amongst the pSK1-like plasmid containing population (Figure  
320 S3, Table S2). Therefore, gentamicin also does not appear to be acting as a significant driver of  
321 plasmid structural remodelling.

322 ***Chlorhexidine***. Phenotypic tolerance to CHX was detected in 150 (71.1%) isolates, defined as an  
323 MIC > 2 mg/L [40]. The MIC values of the population ranged from 1 - 6 mg/L, and the MBC  
324 values from 2 - 16 mg/L (Table 1). A total of 156 (73.9%) isolates were found to harbour a *qacA*  
325 gene and two a *qacC* gene (Table 1). The latter, also known as *qacD*, *smr* or *ebr*, although encoding  
326 a biocide active efflux pump is not active against CHX [40]). The *qacA* gene was consistently



327 associated with isolates that carried either a pSK1-like (Australian clade) or pTW20\_1-like  
328 plasmid (Asian-Australian clade). The presence of *qacA* was significantly associated with an  
329 elevated MIC and MBC to CHX ( $p < 0.0001$ , Table 2). Although *qacA* was equally prevalent in  
330 both the Australian and Asian-Australian clades, 89 (72.4%) and 67 (76.1%) isolates respectively,  
331 the former population demonstrated a significantly higher average MIC ( $p < 0.0001$ , Table 2). This  
332 phenotypic disparity remained when isolates that did not carry either plasmid were excluded from  
333 the comparison, suggesting that genotypic differences between the two plasmid populations could  
334 be contributing to the observed phenotypic variation. A comparison of all *qacAR* sequences to  
335 reference JKD6008 (Australian clade) identified six SNPs resulting in missense mutations, five in  
336 *qacA* and one in *qacR*. Examination of the prevalence, phylogenetic correlation, and phenotypic  
337 association of the mutations found that none could explain the difference in tolerance observed  
338 between the two clades (Supplementary Results). Using sequence read coverage data, plasmid  
339 copy number was also investigated. This analysis revealed that both pSK1-like and pTW20\_1-like  
340 plasmids were low copy number (average of one and three copies, respectively) and maintained  
341 only a single copy of *qacA* per plasmid (Supplementary Results). While this finding was consistent  
342 with previous reports and pSK1-like variants commonly being chromosomally integrated [15], it  
343 did not explain the observed phenotypic variation and suggested that genotypic difference  
344 occurring outside of *qacAR* were responsible.

345 As with gentamicin, linear models were developed to investigate the CHX phenotypic data for  
346 temporal trends, which may indicate a role for pSK1 family evolution in the development of CHX  
347 tolerance (Figure S3). These models also suggested a trend of increasing MIC and MBC to CHX  
348 overtime. Again, this trend was observed in the Australian but not the Asian-Australian clades  
349 when modelled separately. In contrast to the evolutionary phenomena facilitating the development

350 of reduced antibiotic susceptibility, adaptive evolution in the Australian clade appeared to be the  
351 sole contributor to enhanced CHX tolerance. The Asian-Australian clade is less tolerant to CHX,  
352 subsequently its introduction into the region, although increasing the prevalence of *qacA*,  
353 contributed minimally to the population level shift in phenotype (Table 2). In the Australian clade,  
354 the presence of a pSK1-like plasmid was significant associated with increase in CHX MIC and  
355 MBC ( $p < 0.0001$ , Table 2). However, an increase in the prevalence of these plasmids in the  
356 population alone could not account for the extent of intra-clade variation observed (Figure 4), and  
357 when the plasmid-harboring population was modelled separately the trend towards enhanced  
358 tolerance remained (Figure S3). Comparison of the average MIC and MBC between the pSK1-like  
359 variants suggested the more recently emerged SVs (SV2 to SV6) may be associated with increased  
360 tolerance (Figure 5, Table S2). When the plasmid-harboring population were grouped based on  
361 structural similarities, chromosomal integration was significantly associated with an increased  
362 CHX MIC ( $p = 0.0086$ , Table S2). Furthermore, a multi-CDS deletion in the plasmid backbone  
363 appeared to be associated with a further increase in MIC, although this was statistically non-  
364 significant (Table S2). It is unclear why these structural changes were only associated with a shift  
365 in MIC, with all groups having demonstrated highly consistent average MBC values (Figure 5),  
366 but this might reflect the specific mechanisms mediating enhanced CHX tolerance or the method  
367 utilised to estimate the MBC.

368 Collectively, these findings suggest that convergent evolution of pSK1 is associated with and likely  
369 contributing to the development of enhanced CHX tolerance in the Australian clade. Subsequently  
370 CHX use, which is extensive in the healthcare environment, being a fundamental component of  
371 infection control practices and hand hygiene initiatives in Australia and proven to be effective in  
372 reducing rates of invasive staphylococcal disease [57, 58], is a possible driver of pSK1 evolution.

373 Although strongly suggested by these data, this hypothesis will need additional experimentation  
374 to confirm this association and demonstrate that exposure to CHX promotes pSK1-like plasmid  
375 maintenance through chromosomal integration.

376

### 377 *Independent Association of CHX Tolerance with pSK1-Like Plasmid Evolution*

378 To examine the strength of the association between plasmid evolution and the development of  
379 enhanced CHX tolerance in the ST239 population, in addition to exploring other possible  
380 mechanisms that may be contributing to this phenotype, we used three separate statistical-genomic  
381 techniques. In contrast to the previous analyses, these models have focused on the CHX phenotype  
382 with no prior assumption that plasmid evolution is a contributing factor.

383 Common approaches to associating phenotype with genotype involve techniques such as Genome  
384 Wide Association Studies (GWAS) and Discriminant Analysis of Principal Components (DAPC),  
385 which look for the presence/absence of mutations and/or genes that are disproportionately  
386 correlated with a phenotype of interest. Both approaches were utilised in this work, neither  
387 identifying any significant genotypes (outside of the *qacA*-harbouring plasmids) that could be  
388 responsible for enhanced CHX tolerance (Supplementary Results).

389 We therefore performed a modified Bayesian phylogeographic analysis, modelling the CHX  
390 phenotype rather than geographic location of the ancestral genomes. The hypothesis was that if the  
391 development of CHX tolerance was a consequence of plasmid evolution then the ancestral nodes  
392 (ANs) from which the SVs were estimated to have emerged should correlate with those in which  
393 a shift in MIC is predicted (Figure 5). In this model, a shift in MIC was predicted at the expected  
394 ANs for the emergence of the newer SVs. In the case of SV3, SV4 and SV5' the estimated ancestral

395 MIC had increased to 4 mg/L, from either 2 or 3 mg/L in the preceding ANs. The emergence of  
396 SV5 and SV6 also correlated with a shift in MIC from 4 to 6 mg/L. In the older SVs, a shift in  
397 MIC was modelled to have occurred a few nodes following the emergence of the SV. This  
398 discrepancy is likely due to the presence of multiple isolates not harbouring a pSK1-like plasmid  
399 in close proximity to these ANs. In the case of SV1, a shift in MIC from 2 to 3 mg/L was observed  
400 in the AN for a sub-clade of isolates. Similarly, a shift in MIC from 2 to 6 mg/L was observed in  
401 the AN for a sub-clade of SV2 harbouring isolates. The overall strong correlation between the  
402 emergence of the different pSK1-like SVs and estimated shifts in phenotype (5/8 ANs for all SVs,  
403 or 7/8 ANs when the SV1 and SV2 sub-clades are considered), in combination with the absence  
404 of an identifiable alternative genotypic mechanisms, provides further support for the association  
405 between structural remodelling in the pSK1-like plasmid population and the development of  
406 enhanced CHX tolerance in ST239 MRSA.

## 407 **Conclusions**

408 Plasmids and other MGEs play a central role in the successful evolution and adaptation of bacterial  
409 populations but are often overlooked because of the challenges with examining some plasmid  
410 DNA sequences using short-read data. Here, we have provided a comprehensive analysis of the  
411 evolution of the pSK1-like plasmid population that has co-evolved with the Australian ST239  
412 MRSA lineage for multiple decades. Within the ST239 MRSA population circulating in Australia,  
413 the pSK1-like plasmid population is structurally diverse, with eight distinct variants identified  
414 having arisen largely through IS256- and IS257-mediated loss/gain of the composite transposons,  
415 chromosomal integration, deletion/exclusion of CDS, and inversions. When assessed by a temporal  
416 phylogenetic model, it appeared that the plasmid population had undergone convergent evolution,  
417 with the repeated emergence of chromosomally integrated SVs. In investigating potential drivers  
418 for plasmid evolution, it was identified that chromosomal integration was strongly associated with  
419 the development of enhanced CHX tolerance. While the mechanism mediating enhanced tolerance  
420 remains unclear, we speculate that it is linked to altered regulation of the *qacAR* efflux system,  
421 potentially resulting from the movement of IS elements and changes in plasmid configuration.  
422 These findings support the idea that the widespread and increasing use of CHX is possibly  
423 contributing to the evolution of the pSK1 family of plasmids. Although the levels of reduced  
424 susceptibility observed in this study remain well below in-use concentrations for this biocide, they  
425 do illustrate an evolutionary response in ST239 MRSA, one that may provide an adaptive  
426 advantage in healthcare institutions.

## 427 **Materials and Methods**

428 **Bacterial Isolates.** This study utilised a temporal (recovered between 1980 and 2012) and  
429 geographically diverse collection of 212 Australian ST239 *S. aureus*. Two isolates, including  
430 reference *S. aureus* JKD6008, were recovered in New Zealand [59]. All isolates represented cases  
431 of clinical infection. To establish global phylogenetic context for the collection, we supplemented  
432 this data with the WGS data for a further 319 international ST239 *S. aureus*. Relevant isolate  
433 information can be found in Supplementary Dataset.

434 **Whole Genome Sequencing & Sequence Data.** The WGS data for 368 of the 531 isolates (73 of  
435 the 212 Australian isolates) had been previously published. All sequence data novel to this study  
436 has been made publicly available. Seven isolates were subjected to long-read sequencing to enable  
437 complete genome assembly. Information about the generation of novel sequence data, relevant  
438 WGS information and accession numbers can be found in the Supplementary Materials.

439 **Bioinformatic Analysis.** The bioinformatic analyses performed for this study have been explained  
440 in detail in the Supplementary Methods and are briefly outlined here. Sequence data was mapped  
441 to reference *S. aureus* JKD6008 (GenBank accession CP002120, [60]) or reference plasmid pSK1  
442 (NC\_014369, [31]) using Snippy v3.2 (<https://github.com/tseemann/snippy>). Maximum likelihood  
443 phylogenetic trees were generated with IQ-TREE v1.6.1 [61], and maximum clade credibility trees  
444 were generated with BEAST v2.4.7 [62]. Trees were visualised in FigTree v1.4.3  
445 (<http://tree.bio.ed.ac.uk/software/figtree/>) and figures were assembled in Inkscape v0.91  
446 (<https://inkscape.org/>). Short read sequence data was *de novo* assembled using SPAdes v3.11.0  
447 [63], and annotated with Prokka v1.12 [64]. Long-read sequence data was *de novo* assembled using  
448 the SMRT Analysis System v2.3.0.140936 (Pacific Biosciences), circularised and reorientated in

449 Geneious v8.1.5 (Biomatters), and polished with Snippy v3.2. Plasmid structural comparisons  
450 were conducted using the Artemis Comparison Tool [65]. Ortholog clustering was performed  
451 using Roary [66].

452 ***Antimicrobial Susceptibility Testing.*** Phenotypic susceptibility testing to trimethoprim and  
453 gentamicin was performed using E-tests (bioMérieux), and interpreted using CLSI guidelines  
454 (M100S, 26<sup>th</sup> Ed). Susceptibility to CHX was performed using a modified broth microdilution  
455 method. CHX MICs were read after 24 hours incubation, and all wells were sub-cultured to assess  
456 viability. All isolates were tested in biological triplicate and the median values used for statistical  
457 analysis. Susceptibility testing procedures are explained in detail in the Supplementary Methods.  
458 All statistical analyses were performed in R v3.4.2 (<http://www.R-project.org/>), with significance  
459 determined as a p value  $\leq 0.05$ .

460 **Acknowledgements.**

461 This work was funded by the National Health and Medical Research Council, Australia  
462 (Fellowships GNT1105905 to BPH; Project GNT457454 to NF and SOJ). SLB was supported by  
463 an Australian Government Research Training Program Scholarship, and a Victorian Fellowship  
464 provided by the Victorian State Government.

465 We thank Eloise Alison for her assistance in generating the phenotypic susceptibility data.

466

467 **Figure Legends.**

468 **Figure 1. Structure and prevalence of pSK1 plasmids in ST239 MRSA.** (A) pSK1 sequence  
469 and annotations are that previously published, GenBank accession GU565967.1 [47]. Predicted  
470 CDS have been coloured based on defined regions. Insertion sequences (IS) are coloured grey  
471 (IS256) and black (IS257), with target site duplications (TSD) illustrated: arrows indicate  
472 upstream/downstream sequences, orientation, and are coloured to represent unique sequences  
473 (refer to key). (B) Graph illustrates the increasing prevalence of pSK1 family plasmids in the  
474 Australian ST239 clade overtime. The cumulative total of the sampled population is indicated by  
475 the solid line and the proportion in which a pSK1-like plasmid was identified by the broken line.

476 **Figure 2. pSK1 plasmid gene presence and synteny.** (A) Maximum likelihood phylogenetic tree  
477 inferred from 3,883 core genome SNPs illustrates the population structure of ST239 *S. aureus* in  
478 Australia. Tips are coloured based on location (refer to key). Branches with < 70% bootstrap  
479 support are coloured red. (B) Coloured blocks represent the identification of a pSK1 gene, using a  
480 95% amino acid homology threshold (excluding IS elements). Box length is reflective of gene



481 length and ordered based on pSK1 (Figure 1A). Boxes are linked if CDS were found to be syntenic.  
482 Coloured boxes reflect one of six defined gene patterns (GP), with location of GP label indicating  
483 the isolates selected for long-read sequencing.

484 **Figure 3. pSK1-like structural variants.** Illustrated is a schematic of the development of the  
485 pSK1-like structural variants. Predicted CDS are coloured based on defined pSK1 regions (Figure  
486 1A), IS256 are grey, IS257 are black, and chromosomal CDS are lilac. Arrows denote  
487 upstream/downstream target site duplications (TSD), and direction denotes IS orientation. Circles  
488 represent a single copy of a TSD not adjacent to an IS element. Arrows and circles are coloured to  
489 reflect unique sequences (refer to key), and a star has been used to indicate a TSD present in the  
490 reverse complement to what was expected. In the structural comparisons, connected regions share  
491  $\geq 98\%$  nucleotide sequence identity, coloured pink or blue to indicate matching or reverse  
492 orientation, respectively. (A) Illustrates the emergence of pSK1-like variants through IS-mediated  
493 loss/gain of the composite transposons: (i) Tn4001 acquired in SV1 to produce pSK1, and (ii)  
494 Tn4003 deleted from pSK1 to produce SV3 (with an additional IS256-mediated inversion). (B)  
495 Illustrates three IS-mediated chromosomal integration events: (i) integration of pSK1 adjacent to  
496 *sarA* (SV2), integration of SV3 near *alr* (SV4), and integration of pSK1 near  $\phi$ Sa3 (SV6). All three  
497 SVs have undergone IS256-mediated exclusion/deletion of CDS encoding the plasmid replication  
498 machinery. (C) Illustrates the large IS257-mediated inversion event in the hypothesised SV5' that  
499 gave rise to SV5 and resulted in the fragmentation of  $\phi$ Sa3.

500 **Figure 4. Phenotypic variation in chlorhexidine tolerance.** Graphs illustrate the distribution of  
501 chlorhexidine MIC (top panel) and MBC (bottom panel) values in the Australian clade. Boxplot  
502 features represent the population median (central black line), upper and lower quartiles (box), and  
503 range (bars) excluding outliers (circles). Boxplots representing SVs are coloured to reflect a

504 plasmid structural feature: extra-chromosomal plasmid (teal), and chromosomally integrated with  
505 either an internal *repA* deletion (light blue) or a multi-CDS region 1 deletion (dark blue).

506 **Figure 5. Bayesian phylogenetic model associating chlorhexidine tolerance with pSK1-like**  
507 **plasmid evolution.** Illustrated is a maximum clade credibility tree inferred from the whole genome  
508 alignment of the Australian clade (n = 124). Isolates identified as harbouring a pSK1-like plasmid  
509 are indicated by a circle located adjacent to the tree and coloured based on the SV identified. The  
510 ancestral nodes in which each SV is estimated to have emerged are indicated by a number (refer  
511 to key), those coloured black represent an extra-chromosomal plasmid and those coloured white  
512 represent a genomic island. The estimated CHX MIC for all ancestral nodes is indicated by a circle,  
513 coloured based on the MIC value and sized according to the posterior probability for the estimate  
514 (refer to key). Blue bars represent the 95% highest posterior density interval for the node heights.  
515 The aligned heatmap illustrates the phenotypic MIC values attained for each isolate.

516 **Table 1. Population Distributions of Antimicrobial and Biocide Resistance Genes and Phenotypic Resistance Profiles.**

|                                                                  | All ST239<br>(n = 211)                                                   | Asian-Australian<br>Clade (n = 88)                       | Australian Clade<br>(n = 123)                                        | SK1 Plasmid<br>(n = 91)                                              |
|------------------------------------------------------------------|--------------------------------------------------------------------------|----------------------------------------------------------|----------------------------------------------------------------------|----------------------------------------------------------------------|
| <i>Phenotypic antimicrobial resistance - median (range) mg/L</i> |                                                                          |                                                          |                                                                      |                                                                      |
| <b>Trimethoprim (MIC)<sup>a</sup></b>                            | > 32 (-)                                                                 | -                                                        | -                                                                    | -                                                                    |
| <b>Gentamicin (MIC)<sup>a</sup></b>                              | 32 (0.023 – 256)                                                         | 256 (0.38 – 256)                                         | 16 (0.023 – 256)                                                     | 24 (0.032 – 256)                                                     |
| <b>Chlorhexidine (MIC)<sup>b</sup></b>                           | 3 (1 – 6)                                                                | 3 (1.5 – 4)                                              | 4 (1 – 6)                                                            | 4 (1 – 6)                                                            |
| <b>Chlorhexidine (MBC)<sup>b</sup></b>                           | 6 (2 – 16)                                                               | 6 (3 – 12)                                               | 8 (2 – 16)                                                           | 8 (2 – 16)                                                           |
| <i>Prevalence of acquired resistance genes<sup>c</sup> (n)</i>   |                                                                          |                                                          |                                                                      |                                                                      |
| <b><i>dfr</i> genes</b>                                          | <i>dfrA</i> (76)<br><i>dfrG</i> (88)                                     | -<br><i>dfrG</i> (88)                                    | <i>dfrA</i> (76)<br>-                                                | <i>dfrA</i> (76)<br>-                                                |
| <b>AME genes</b>                                                 | <i>aac6'-aph2''</i> (180)<br><i>aadD</i> (72)<br><i>aph(3')-III</i> (95) | <i>aac6'-aph2''</i> (82)<br>-<br><i>aph(3')-III</i> (87) | <i>aac6'-aph2''</i> (98)<br><i>aadD</i> (72)<br><i>aph3'-III</i> (8) | <i>aac6'-aph2''</i> (85)<br><i>aadD</i> (67)<br><i>aph3'-III</i> (5) |
| <b><i>qac</i> genes</b>                                          | <i>qacA</i> (156)<br><i>qacC</i> (2)                                     | <i>qacA</i> (67)<br>-                                    | <i>qacA</i> (89)<br><i>qacC</i> (2)                                  | <i>qacA</i> (89)<br>-                                                |

517 Abbreviations: MIC, minimum inhibitory concentration; MBC, minimum bactericidal concentration

518 <sup>a</sup> Phenotypic susceptibility against trimethoprim and gentamicin was determined by E-test.

519 <sup>b</sup> Phenotypic susceptibility against chlorhexidine was determined by broth microdilution.

520 <sup>c</sup> Identification of resistance genes was determined by local alignment, minimum alignment of 70% gene length and > 95% nucleotide  
521 homology required to call a match.

522 **Table 2. Investigation of Chlorhexidine Tolerance in Australian ST239 MRSA**

| Isolate Populations (n)                                | Median (mg/L)<br>MIC; MBC |    | Isolate Populations (n)                       | Median (mg/L)<br>MIC; MBC | P value<br>MIC; MBC |
|--------------------------------------------------------|---------------------------|----|-----------------------------------------------|---------------------------|---------------------|
| <b>All ST239 (211)</b>                                 |                           |    |                                               |                           |                     |
| <i>qacA</i> Negative (55)                              | 0.90; 2.30                | vs | <i>qacA</i> Positive (156)                    | 3.70; 8.00                | < 0.0001; < 0.0001  |
| Australian Clade (123)                                 | 3.40; 7.30                | vs | Asian-Australian Clade (88)                   | 2.30; 6.70                | < 0.0001; NS        |
| SK1 plasmid (91)                                       | 4.20; 8.60                | vs | pTW20_1-like (67)                             | 3.00; 7.20                | < 0.0001; 0.0021    |
| <b>Asian-Australian Clade (88)</b>                     |                           |    |                                               |                           |                     |
| <i>qacA</i> Negative (21)                              | 1.90; 5.20                | vs | <i>qacA</i> Positive (67)                     | 3.00; 7.20                | < 0.0001; < 0.0001  |
| <b>Australian Clade (123)</b>                          |                           |    |                                               |                           |                     |
| <i>qacA</i> Negative (34)                              | 1.80; 4.60                | vs | <i>qacA</i> Positive (89)                     | 4.30; 8.60                | < 0.0001; < 0.0001  |
| Extra-chromosomal SVs (17)                             | 3.20; 7.80                | vs | Integrated SV (74)                            | 4.50; 8.74                | 0.0086; NS          |
| Integrated SV + <i>repA</i> deletion (25) <sup>b</sup> | 3.70; 8.50                | vs | Integrated SV + R1 deletion (49) <sup>c</sup> | 4.70; 8.60                | NS; NS              |

523 Abbreviations: MIC, minimum inhibitory concentration; MBC, minimum bactericidal concentration; R1, pSK1 region 1; SV, structural  
 524 variant.

525 <sup>a</sup> Population includes SV5' and SV5; <sup>b</sup> Population includes SV2, SV4, and SV6.

## 526 **Supplementary Materials**

527 **Supplementary Dataset.** This file summarises the relevant isolates demographics and WGS  
528 information (including sequence data accession numbers) for all isolates included in this study.

529 **Supplementary Methods.** This file contains additional information about materials and methods  
530 used in this study.

531 **Supplementary Tables.** This file contains additional tables which provide information about the  
532 distribution of gentamicin and chlorhexidine susceptibility in the ST239 MRSA population.

533 **Supplementary Results.** This file contains additional analyses and results relevant to this study.

534 **Supplementary Figure S1. Global population structure of ST239 *S. aureus*.** Illustrated is a  
535 maximum clade credibility tree inferred from the whole genome alignment of the 531 international  
536 ST239 isolates. Tips are coloured based on location (refer to keys). Nodes with > 95% posterior  
537 support are indicated by a red dot. The Australian and two Asian-Australian clades (major and  
538 minor) and estimates for the most recent common ancestor (MRCA) are indicated, displayed as  
539 “median year (95% highest posterior density range)”.

540 **Supplementary Figure S2. Phylogenetic model for the emergence of pSK1 plasmid variants.**

541 Illustrated is a maximum clade credibility tree inferred from the whole genome alignment of the  
542 Australian clade (n = 124). Isolates identified as harbouring a pSK1-like plasmid are indicated by  
543 a circle located at the branch tip and coloured based on the SV identified (refer to key). The most  
544 recent common ancestor (MRCA) for each SV is indicated by the larger node circle, with black  
545 numbers indicating an extrachromosomal SV and white numbers a chromosomally integrated SV.  
546 Temporal estimates for these nodes have been provided, displayed as “SV – median year (95%

547 highest posterior density range)”. The two isolates with pSK1 region 1 (R1) deletions in the SV5’  
548 and SV5 clade are indicated by a star. Grey arrows illustrate the likely order of structural  
549 remodelling that has occurred during the evolution of the pSK1-like plasmid population. Branches  
550 with < 95% posterior support are coloured red. The 95% highest posterior density for node heights  
551 is represented by the blue bars.

552 **Supplementary Figure S3. Modelling temporal-association in phenotypic susceptibility data.**

553 Graphs depict linear models developed to explore the potential association between gentamicin  
554 MIC and chlorhexidine MIC and MBC with the year in which isolates were recovered. The dotted  
555 line indicates the smoothed mean MIC and the bold line indicates the fitted linear model. Four  
556 populations were tested (from top to bottom): (i) All ST239 MRSA (n = 211), (ii) the Asian-  
557 Australian clade (n = 88), (iii) the Australian clade (n = 123), and (iv) the pSK1-like plasmid  
558 harbouring population (n = 96).

## 559 References

- 560 1. **Ochman H, Lawrence JG, Groisman EA.** Lateral gene transfer and the nature of bacterial  
561 innovation. *Nature* 2000;405(6784):299-304.
- 562 2. **Frost LS, Leplae R, Summers AO, Toussaint A.** Mobile genetic elements: the agents of open  
563 source evolution. *Nat Rev Microbiol* 2005;3(9):722-732.
- 564 3. **Soucy SM, Huang J, Gogarten JP.** Horizontal gene transfer: building the web of life. *Nat Rev*  
565 *Genet* 2015;16(8):472-482.
- 566 4. **Partridge SR, Kwong SM, Firth N, Jensen SO.** Mobile Genetic Elements Associated with  
567 Antimicrobial Resistance. *Clin Microbiol Rev* 2018;31(4).
- 568 5. **van Hal SJ, Jensen SO, Vaska VL, Espedido BA, Paterson DL et al.** Predictors of mortality in  
569 *Staphylococcus aureus* Bacteremia. *Clin Microbiol Rev* 2012;25(2):362-386.
- 570 6. **Tong SY, Davis JS, Eichenberger E, Holland TL, Fowler VG, Jr.** *Staphylococcus aureus* infections:  
571 epidemiology, pathophysiology, clinical manifestations, and management. *Clin Microbiol Rev*  
572 2015;28(3):603-661.
- 573 7. **Pavillard R, Harvey K, Douglas D, Hewstone A, Andrew J et al.** Epidemic of hospital-acquired  
574 infection due to methicillin-resistant *Staphylococcus aureus* in major Victorian hospitals. *Med J Aust*  
575 1982;29(1):451-454.
- 576 8. **Cookson BD, Philips I.** Epidemic methicillin-resistant *Staphylococcus aureus*. *J Antimicrob*  
577 *Chemother* 1988;21 (Suppl.C):57-65.
- 578 9. **Dubin DT, Chikramane SG, Inglis B, Matthews PR, Stewart PR.** Physical mapping of the *mec*  
579 region of an Australian methicillin-resistant *Staphylococcus aureus* lineage and a closely related  
580 American strain. *J Gen Microbiol* 1992;138:169-180.
- 581 10. **Harris SR, Feil EJ, Holden MTG, Quail MA, Nickerson EK et al.** Evolution of MRSA during hospital  
582 transmission and intercontinental spread. *Science* 2010;327:469-474.
- 583 11. **Castillo-Ramirez S, Corander J, Marttinen P, Aldeljawi M, Hanage WP et al.** Phylogeographic  
584 variation in recombination rates within a global clone of methicillin-resistant *Staphylococcus aureus*.  
585 *Genome Biol* 2012;13:R126.
- 586 12. **Gray RR, Tatem AJ, Johnson JA, Alekseyenko AV, Pybus OG et al.** Testing spatiotemporal  
587 hypothesis of bacterial evolution using methicillin-resistant *Staphylococcus aureus* ST239 genome-wide  
588 data within a bayesian framework. *Mol Biol Evol* 2011;28(5):1593-1603.
- 589 13. **Hsu LY, Harris SR, Chlebowicz MA, Lindsay JA, Koh TH et al.** Evolutionary dynamics of  
590 methicillin-resistant *Staphylococcus aureus* within a healthcare system. *Genome Biol* 2015;16:81.
- 591 14. **Tong SY, Holden MT, Nickerson EK, Cooper BS, Koser CU et al.** Genome sequencing defines  
592 phylogeny and spread of methicillin-resistant *Staphylococcus aureus* in a high transmission setting.  
593 *Genome Res* 2015;25(1):111-118.
- 594 15. **Baines SL, Holt KE, Schultz MB, Seemann T, Howden BO et al.** Convergent adaptation in the  
595 dominant global hospital clone ST239 of methicillin-resistant *Staphylococcus aureus*. *MBio*  
596 2015;6(2):e00080.
- 597 16. **Coombs GW, Nimmo GR, Pearson JC, Collignon PJ, Bell JM et al.** Australian Group on  
598 Antimicrobial Resistance Hospital-onset *Staphylococcus aureus* Surveillance Programme annual report,  
599 2011. *Commun Dis Intell Q Rep* 2013;37(3):E210-218.
- 600 17. **Coombs GW, Daley DA, Thin Lee Y, Pearson JC, Robinson JO et al.** Australian Group on  
601 Antimicrobial Resistance Australian *Staphylococcus aureus* Sepsis Outcome Programme annual report,  
602 2014. *Commun Dis Intell Q Rep* 2016;40(2):E244-254.
- 603 18. **Graham DR, King K, Brady LM, Karkness J.** Gentamicin-Resistant *Staphylococci*. *Lancet*  
604 1981;318(8248):698-699.

- 605 19. **Gedney J, Lacey RW.** Properties of methicillin-resistant staphylococci now endemic in Australia.  
606 *Med J Aust* 1982;1(11):448-450.
- 607 20. **Gilbert GL, Asche V, Hewstone AS, Mathiesen JL.** Methicillin-resistant *Staphylococcus aureus* in  
608 neonatal nurseries. Two years' experience in special-care nurseries in Melbourne. *Med J Aust*  
609 1982;1(11):455-459.
- 610 21. **Gillespie MT, May JW, Skurray RA.** Antibiotic susceptibilities and plasmid profiles of nosocomial  
611 methicillin-resistant *Staphylococcus aureus*: a retrospective study. *J Med Microbiol* 1984;17(3):295-310.
- 612 22. **Lyon BR, May JW, Skurray RA.** Tn4001: a gentamicin and kanamycin resistance transposon in  
613 *Staphylococcus aureus*. *Mol Gen Genet* 1984;193(3):554-556.
- 614 23. **Lyon BR, Iuorio JL, May JW, Skurray RA.** Molecular epidemiology of multiresistant  
615 *Staphylococcus aureus* in Australian hospitals. *J Med Microbiol* 1984;17(1):79-89.
- 616 24. **Skurray RA, Rouch DA, Lyon BR, Gillespie MT, Tennent JM et al.** Multiresistant *Staphylococcus*  
617 *aureus*: genetics and evolution of epidemic Australian strains. *J Antimicrob Chemother* 1988;21 Suppl  
618 C:19-39.
- 619 25. **Wright C, Byrne M, Firth N, Skurray R.** A retrospective molecular analysis of gentamicin  
620 resistant in *Staphylococcus aureus* strains from UK hospitals. *J Med Microbiol* 1998;47:173-178.
- 621 26. **Townsend DE, Ashdown N, Bolton S, Bradley J, Duckworth G et al.** The international spread of  
622 methicillin-resistant *Staphylococcus aureus*. *J Hosp Infect* 1987;9(1):60-71.
- 623 27. **Rouch DA, Messerotti LJ, Loo LS, Jackson CA, Skurray RA.** Trimethoprim resistance transposon  
624 Tn4003 from *Staphylococcus aureus* encodes genes for a dihydrofolate reductase and thymidylate  
625 synthetase flanked by three copies of IS257. *Mol Microbiol* 1989;3(2):161-175.
- 626 28. **Firth N, Skurray RA.** Mobile elements in the evolution and spread of multiple-drug resistance in  
627 staphylococci. *Drug Resist Updat* 1998;1(1):49-58.
- 628 29. **Tennent JM, Lyon BR, Midgley M, Jones IG, Purewal AS et al.** Physical and biochemical  
629 characterization of the *qacA* gene encoding antiseptic and disinfectant resistance in *Staphylococcus*  
630 *aureus*. *J Gen Microbiol* 1989;135(1):1-10.
- 631 30. **Paulsen IT, Brown MH, Littlejohn TG, Mitchell BA, Skurray RA.** Multidrug resistance proteins  
632 QacA and QacB from *Staphylococcus aureus*: membrane topology and identification of residues involved  
633 in substrate specificity. *Proc Natl Acad Sci U S A* 1996;93(8):3630-3635.
- 634 31. **Holden MTG, Lindsay JA, Corton C, Quail MA, Cockfield JD et al.** Genome sequence of a  
635 recently emerged, highly transmissible, multi-antibiotic- and antiseptic-resistant variant of methicillin-  
636 resistant *Staphylococcus aureus*, sequence type 239 (TW). *J Bacteriol* 2010;192(3):888-892.
- 637 32. **Batra R, Cooper BS, Whiteley C, Patel AK, Wyncoll D et al.** Efficacy and limitation of a  
638 chlorhexidine-based decolonization strategy in preventing transmission of methicillin-resistant  
639 *Staphylococcus aureus* in an intensive care unit. *Clin Infect Dis* 2010;50(2):210-217.
- 640 33. **Septimus EJ, Schweizer ML.** Decolonization in Prevention of Health Care-Associated Infections.  
641 *Clin Microbiol Rev* 2016;29(2):201-222.
- 642 34. **Davies GE, Francis J, Martin AR, Rose FL, Swain G.** 1:6-Di-4'-chlorophenyldiguanidohexane  
643 (hibitane); laboratory investigation of a new antibacterial agent of high potency. *Br J Pharmacol*  
644 *Chemother* 1954;9(2):192-196.
- 645 35. **Hugo WB, Longworth AR.** Some Aspects of the Mode of Action of Chlorhexidine. *J Pharm*  
646 *Pharmacol* 1964;16:655-662.
- 647 36. **Russell AD.** Chlorhexidine: antibacterial action and bacterial resistance. *Infection*  
648 1986;14(5):212-215.
- 649 37. **Kampf G, Kramer A.** Epidemiologic background of hand hygiene and evaluation of the most  
650 important agents for scrubs and rubs. *Clin Microbiol Rev* 2004;17(4):863-893, table of contents.
- 651 38. **Hardy K, Sunnucks K, Gil H, Shabir S, Trampari E et al.** Increased Usage of Antiseptics Is  
652 Associated with Reduced Susceptibility in Clinical Isolates of *Staphylococcus aureus*. *MBio* 2018;9(3).



- 653 39. **Hayden MK, Lolans K, Haffnenreffer K, Avery TR, Kleinman K et al.** Chlorhexidine and Mupirocin  
654 Susceptibility of Methicillin-Resistant *Staphylococcus aureus* Isolates in the REDUCE-MRSA Trial. *J Clin*  
655 *Microbiol* 2016;54(11):2735-2742.
- 656 40. **Horner C, Mawer D, Wilcox M.** Reduced susceptibility to chlorhexidine in staphylococci: is it  
657 increasing and does it matter? *J Antimicrob Chemother* 2012;67(11):2547-2559.
- 658 41. **Russell AD.** Do biocides select for antibiotic resistance? *J Pharm Pharmacol* 2000;52(2):227-233.
- 659 42. **Maillard JY.** Bacterial resistance to biocides in the healthcare environment: should it be of  
660 genuine concern? *J Hosp Infect* 2007;65 Suppl 2:60-72.
- 661 43. **Williamson DA, Carter GP, Howden BP.** Current and Emerging Topical Antibacterials and  
662 Antiseptics: Agents, Action, and Resistance Patterns. *Clin Microbiol Rev* 2017;30(3):827-860.
- 663 44. **Littlejohn TG, Paulsen IT, Gillespie MT, Tennent JM, Midgley M et al.** Substrate specificity and  
664 energetics of antiseptic and disinfectant resistance in *Staphylococcus aureus*. *FEMS Microbiol Lett*  
665 1992;74(2-3):259-265.
- 666 45. **Harkins CP, McAleer MA, Bennett D, McHugh M, Fleury OM et al.** The widespread use of  
667 topical antimicrobials enriches for resistance in *Staphylococcus aureus* isolated from patients with atopic  
668 dermatitis. *Br J Dermatol* 2018;179(4):951-958.
- 669 46. **Skovgaard S, Larsen MH, Nielsen LN, Skov RL, Wong C et al.** Recently introduced qacA/B genes  
670 in *Staphylococcus epidermidis* do not increase chlorhexidine MIC/MBC. *J Antimicrob Chemother*  
671 2013;68(10):2226-2233.
- 672 47. **Jensen SO, Apisridej S, Kwong SM, Yang YH, Skurray RA et al.** Analysis of the prototypical  
673 *Staphylococcus aureus* multiresistance plasmid pSK1. *Plasmid* 2010;64:135-142.
- 674 48. **Hulter N, Ilhan J, Wein T, Kadibalban AS, Hammerschmidt K et al.** An evolutionary perspective  
675 on plasmid lifestyle modes. *Curr Opin Microbiol* 2017;38:74-80.
- 676 49. **Aso Y, Sashihara T, Nagao J, Kanemasa Y, Koga H et al.** Characterization of a gene cluster of  
677 *Staphylococcus warneri* ISK-1 encoding the biosynthesis of and immunity to the lantibiotic, nukacin ISK-  
678 1. *Biosci Biotechnol Biochem* 2004;68(8):1663-1671.
- 679 50. **Ramirez MS, Tolmasky ME.** Aminoglycoside modifying enzymes. *Drug Resist Updat*  
680 2010;13(6):151-171.
- 681 51. **Gillespie MT, Lyon BR, Messerotti LJ, Skurray RA.** Chromosome- and plasmid-mediated  
682 gentamicin resistance in *Staphylococcus aureus* encoded by Tn4001. *J Med Microbiol* 1987;24(2):139-  
683 144.
- 684 52. **Mahairas GG, Lyon BR, Skurray RA, Pattee PA.** Genetic analysis of *Staphylococcus aureus* with  
685 Tn4001. *J Bacteriol* 1989;171(7):3968-3972.
- 686 53. **Rouch DA, Byrne, M. E., Kong, Y. C., Skurray, R. A.** The *aacA-aphD* gentamicin and kanamycin  
687 resistance determinant of Tn4001 from *Staphylococcus aureus*: expression and nucleotide sequence  
688 analysis. *J Gen Microbiol* 1987;133:3039-3052.
- 689 54. **McKenzie T, Hoshino T, Tanaka T, Sueoka N.** The nucleotide sequence of pUB110: some salient  
690 features in relation to replication and its regulation. *Plasmid* 1986;15(2):93-103.
- 691 55. **Santanam P, Kayser FH.** Purification and characterization of an aminoglycoside inactivating  
692 enzyme from *Staphylococcus epidermidis* FK109 that nucleotidylates the 4'- and 4''-hydroxyl groups of  
693 the aminoglycoside antibiotics. *J Antibiot (Tokyo)* 1978;31(4):343-351.
- 694 56. **Trieu-Cuot P, Courvalin P.** Nucleotide sequence of the *Streptococcus faecalis* plasmid gene  
695 encoding the 3'5''-aminoglycoside phosphotransferase type III. *Gene* 1983;23(3):331-341.
- 696 57. **Grayson ML, Russo PL, Cruickshank M, Bear JL, Gee CA et al.** Outcomes from the first 2 years of  
697 the Australian National Hand Hygiene Initiative. *Med J Aust* 2011;195(10):615-619.
- 698 58. **Johnson PD, Martin R, Burrell LJ, Grabsch EA, Kirsa SW et al.** Efficacy of an  
699 alcohol/chlorhexidine hand hygiene program in a hospital with high rates of nosocomial methicillin-  
700 resistant *Staphylococcus aureus* (MRSA) infection. *Med J Aust* 2005;183(10):509-514.

- 701 59. **Howden BP, Johnson PDR, Ward PB, Stinear TP, Davies JK.** Isolates with low-level vancomycin  
702 resistance associated with persistent methicillin-resistant *Staphylococcus aureus* bacteremia. *Antimicrob*  
703 *Agents Chemother* 2006;50(9):3039-3047.
- 704 60. **Howden BP, Seemann T, Harrison PF, McEvoy CR, Stanton J-AL et al.** Complete genome  
705 sequence of *Staphylococcus aureus* strain JKD6008, an ST239 clones of methicillin-resistant  
706 *Staphylococcus aureus* with intermediate level vancomycin resistance. *J Bacteriol* 2010;192(21):5848-  
707 5849.
- 708 61. **Nguyen LT, Schmidt HA, von Haeseler A, Minh BQ.** IQ-TREE: a fast and effective stochastic  
709 algorithm for estimating maximum-likelihood phylogenies. *Mol Biol Evol* 2015;32(1):268-274.
- 710 62. **Bouckaert R, Heled J, Kuhnert D, Vaughan T, Wu CH et al.** BEAST 2: a software platform for  
711 Bayesian evolutionary analysis. *PLoS Comput Biol* 2014;10(4):e1003537.
- 712 63. **Bankevich A, Nurk S, Antipov D, Gurevich AA, Dvorkin M et al.** SPAdes: a new genome  
713 assembly algorithm and its applications to single-cell sequencing. *J Comput Biol* 2012;19(5):455-477.
- 714 64. **Seemann T.** Prokka: rapid prokaryotic genome annotation. *Bioinformatics* 2014;30(14):2068-  
715 2069.
- 716 65. **Carver TJ, Rutherford, K. M., Berriman, M., Rajandream, M., Barrell, B. G., Parkhill, J.** ACT: the  
717 Artemis comparison tool. *Bioinformatics Appl Notes* 2005;21(16):3422-3423.
- 718 66. **Page AJ, Cummins CA, Hunt M, Wong VK, Reuter S et al.** Roary: rapid large-scale prokaryote  
719 pan genome analysis. *Bioinformatics* 2015;31(22):3691-3693.

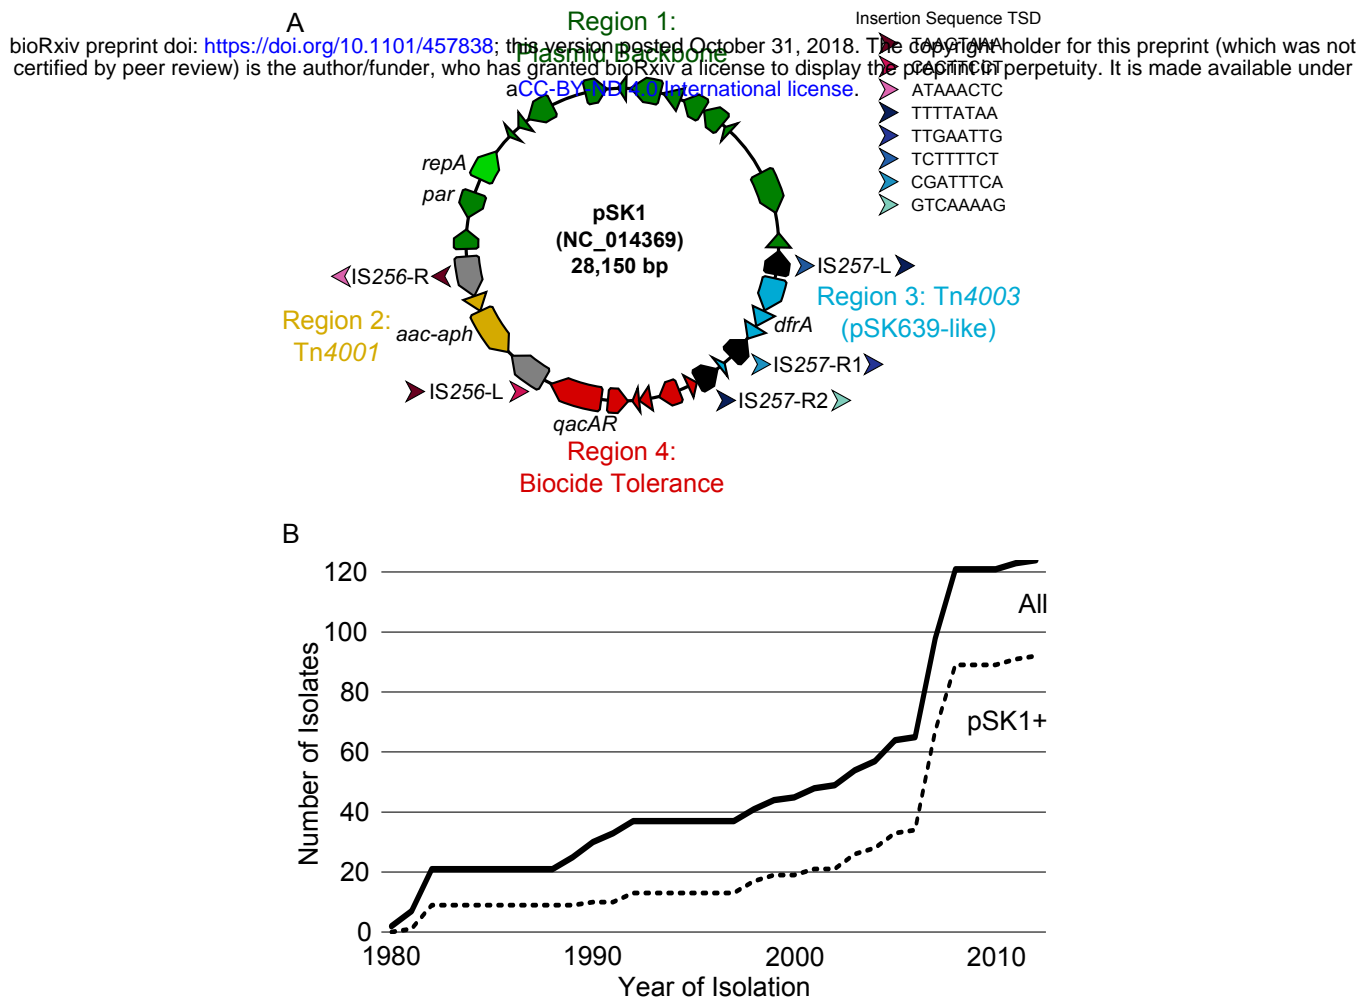

**Figure 1. Structure and prevalence of pSK1 plasmids in ST239 MRSA.** (A) pSK1 sequence and annotations are that previously published, GenBank accession GU565967.1 [47]. Predicted CDS have been coloured based on defined regions. Insertion sequences (IS) are coloured grey (IS256) and black (IS257), with target site duplications (TSD) illustrated: arrows indicate upstream / downstream sequences, orientation, and are coloured to represent unique sequences (refer to key). (B) Graph illustrates the increasing prevalence of pSK1 family plasmids in the Australian ST239 clade overtime. The cumulative total of the sampled population is indicated by the solid line and the proportion in which a pSK1-like plasmid was identified by the broken line.

A

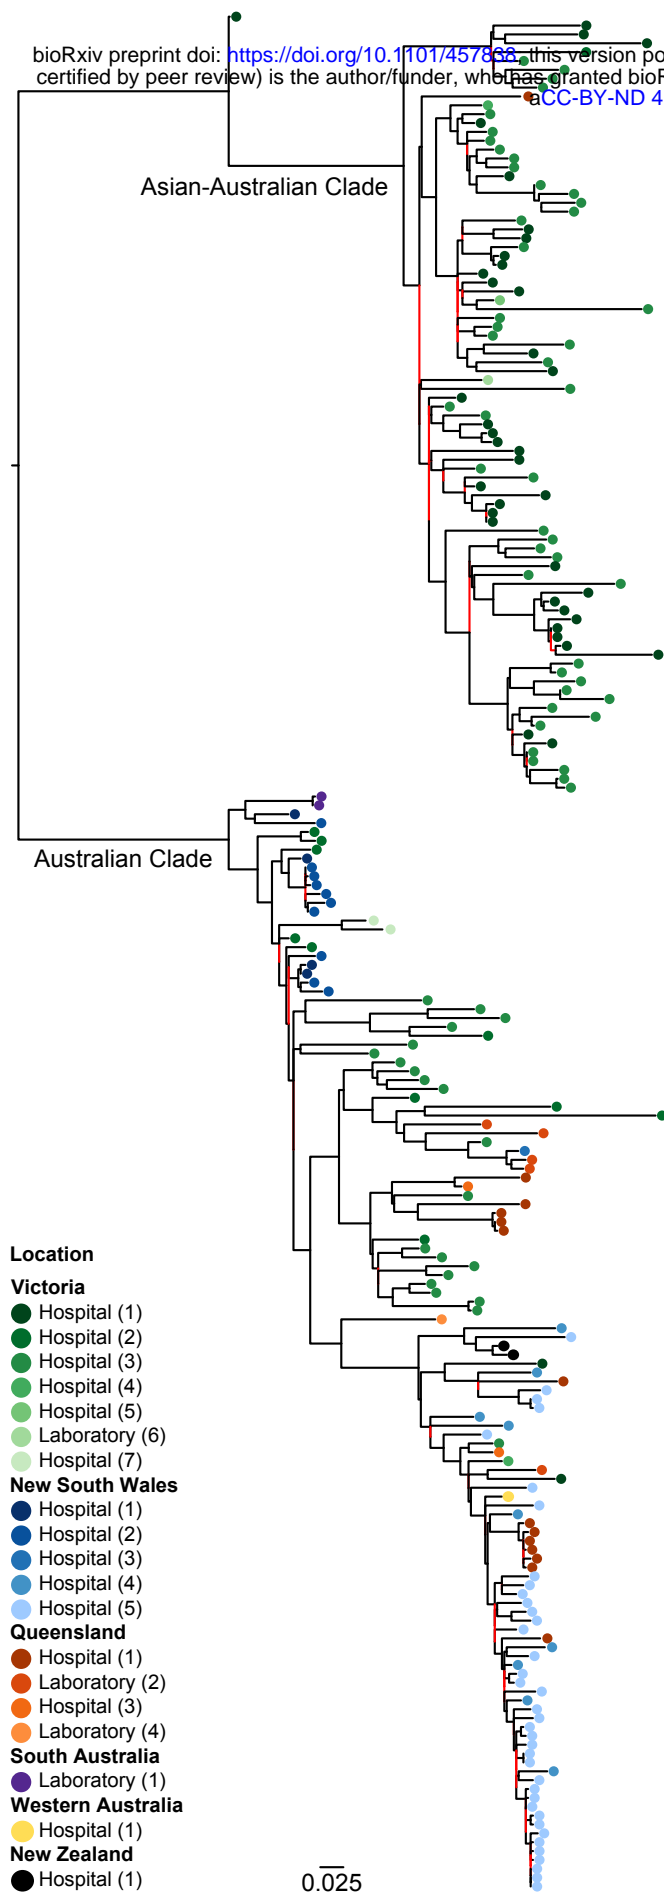

B

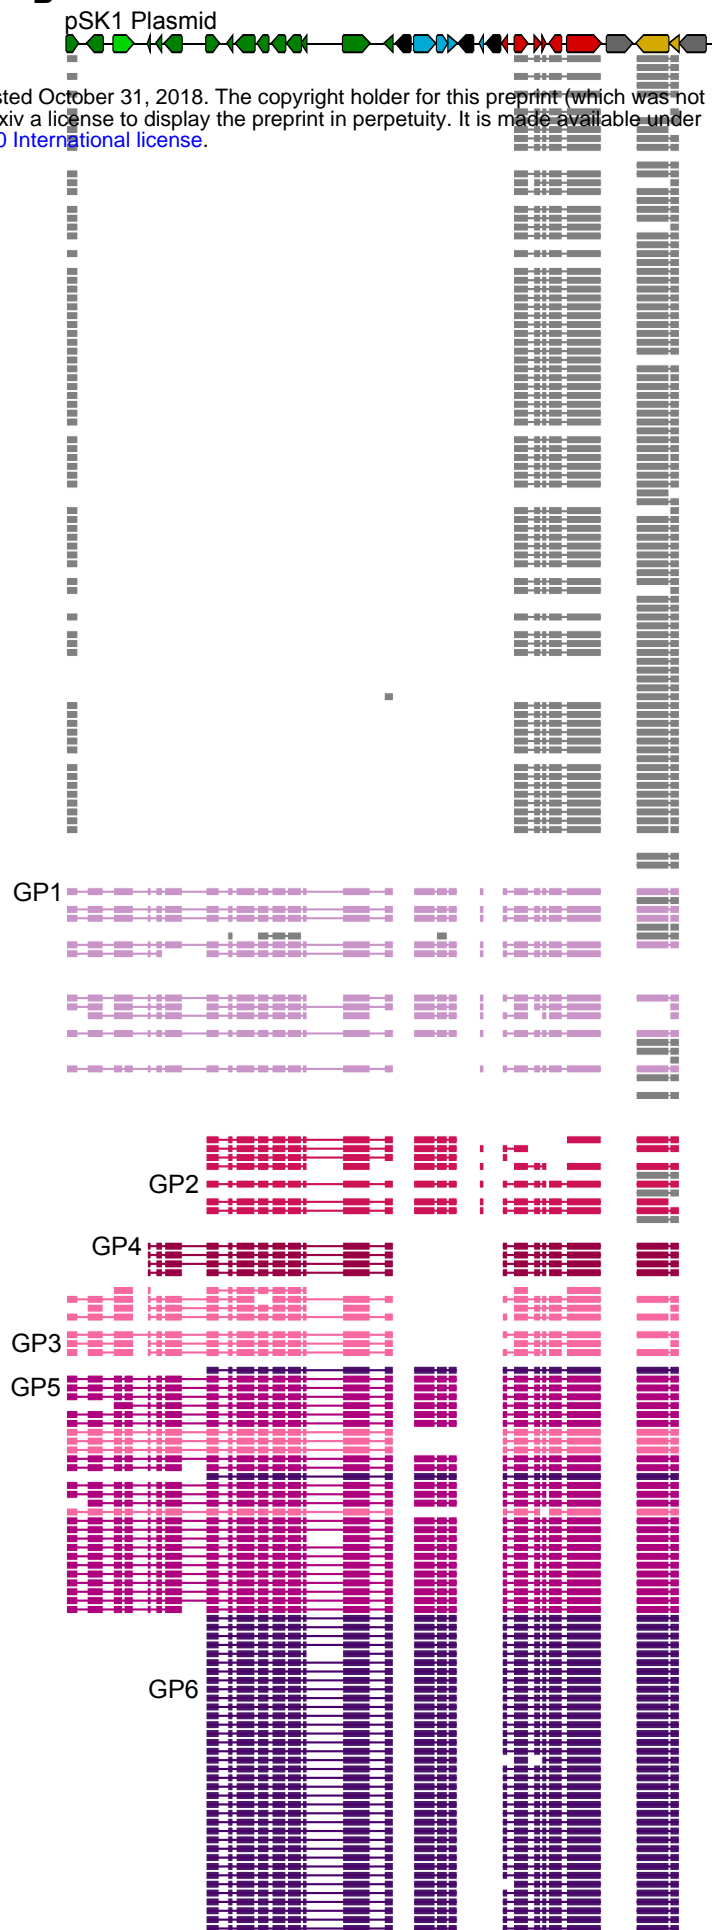

**Figure 2. pSK1 SK1 plasmid gene presence and synteny.** (A) Maximum likelihood phylogenetic tree inferred from 3,883 core genome SNPs illustrates the population structure of ST239 *S. aureus* in Australia. Tips are coloured based on location (refer to key). Branches with < 70% bootstrap support are coloured red. (B) Coloured blocks represent the identification of a pSK1 gene, using a 95% amino acid homology threshold (excluding IS elements). Box length is reflective of gene length and ordered based on pSK1 (Figure 1A). Boxes are linked if CDS were found to be syntenic. Coloured boxes reflect one of six defined gene patterns (GP), with location of GP label indicating the isolates selected for long-read sequencing.

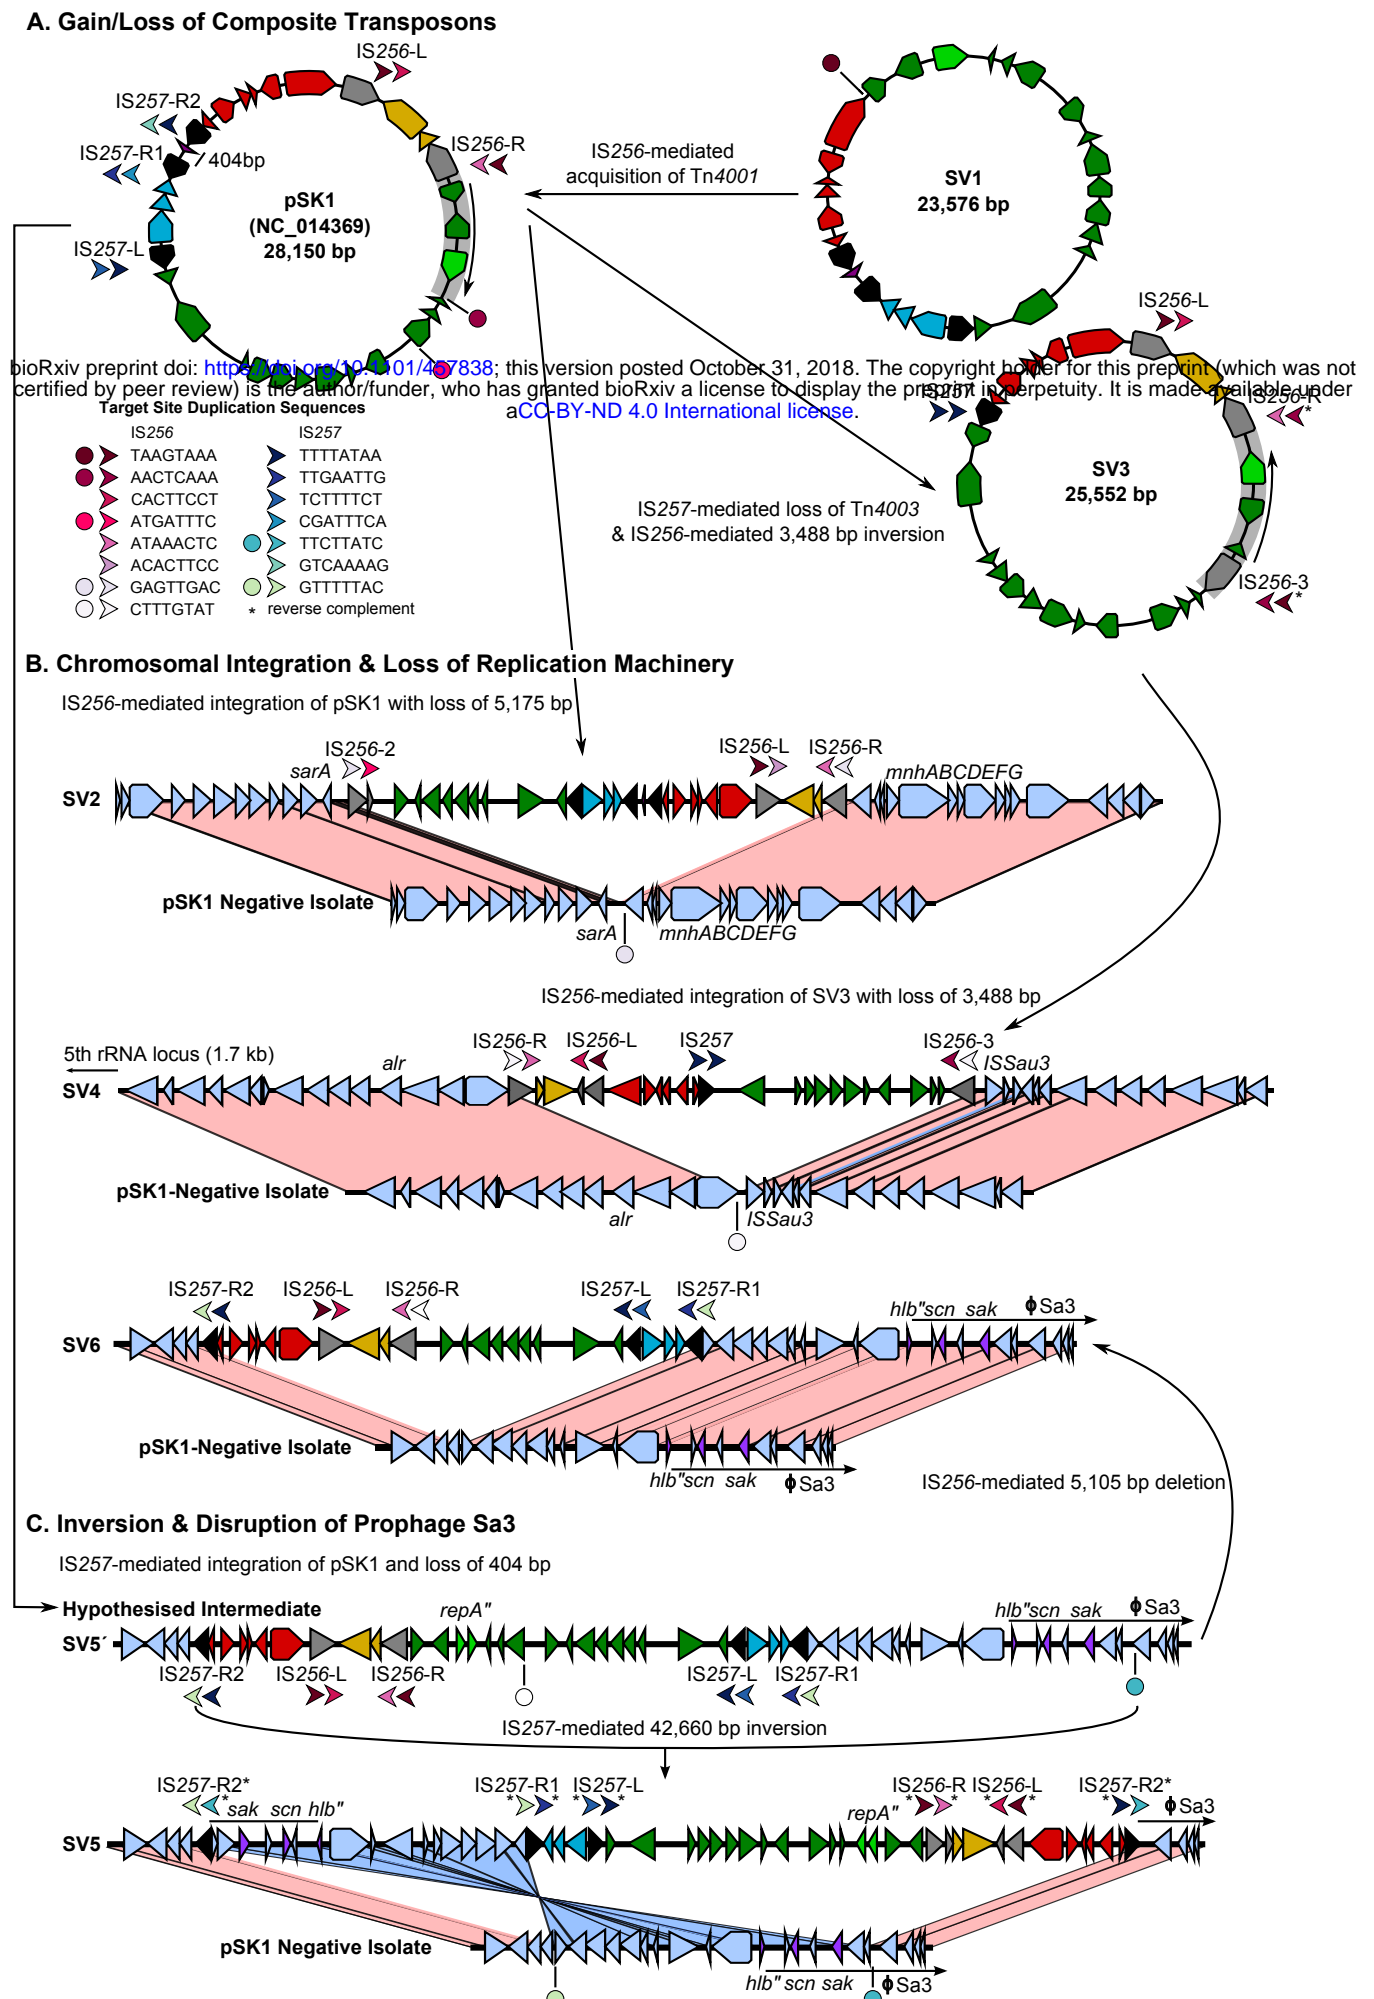

Figure 4

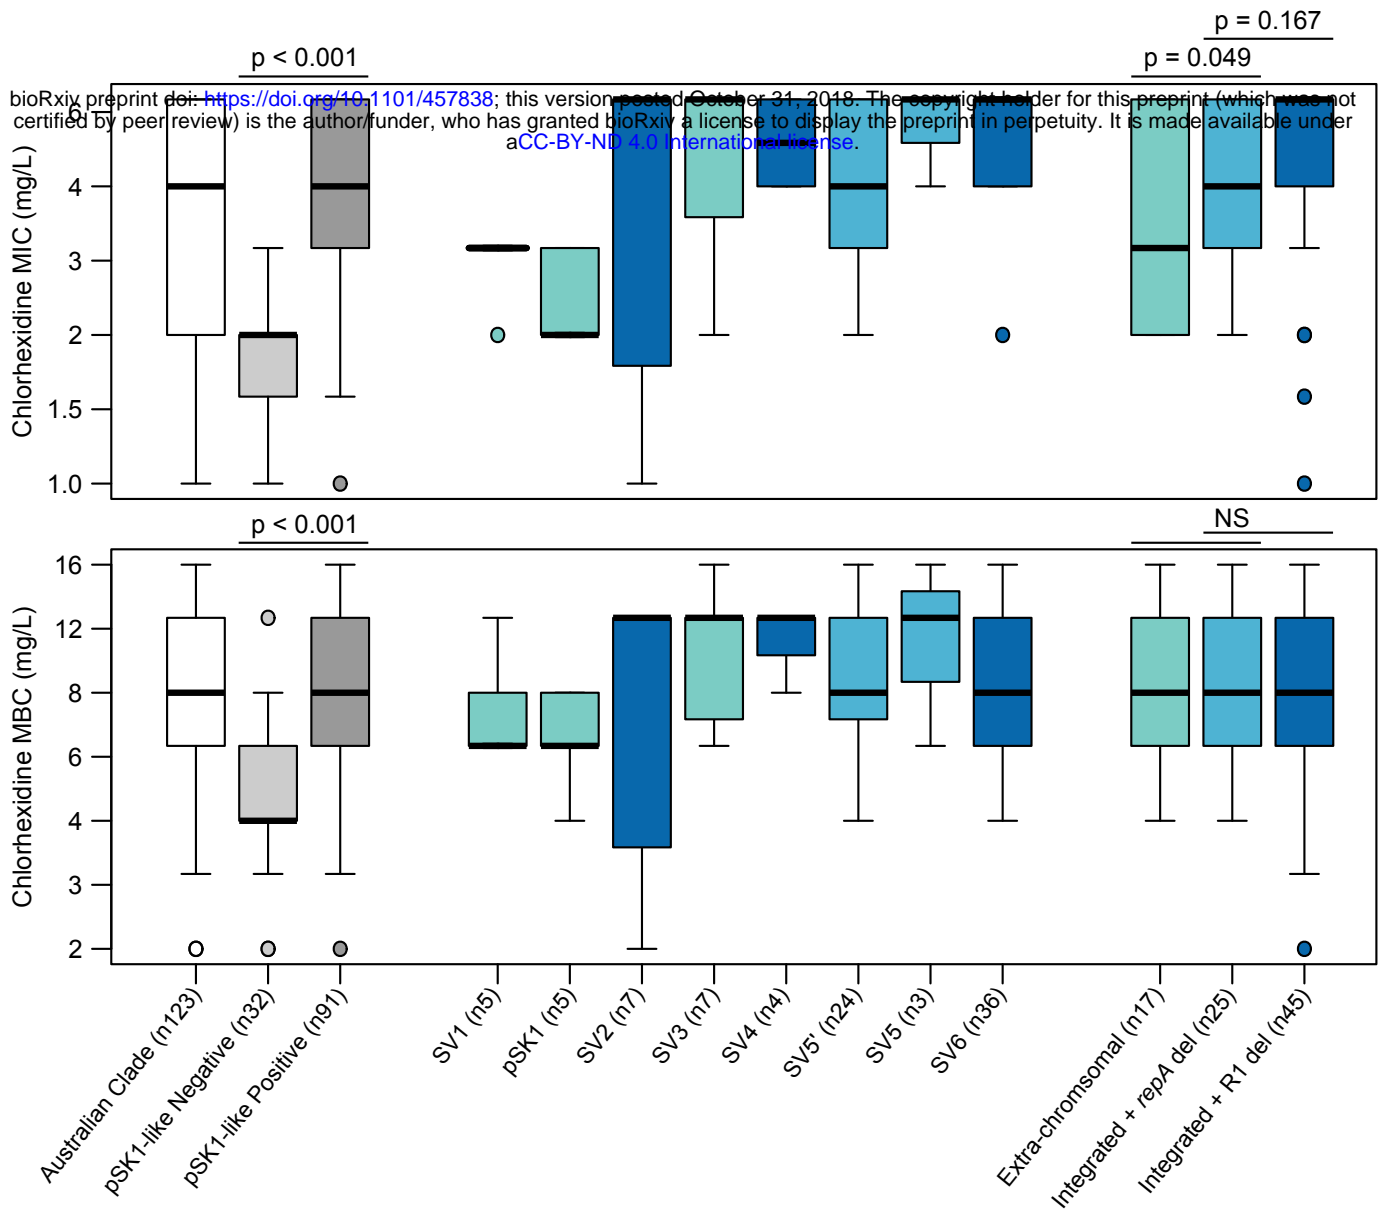

**Figure 4. Phenotypic variation in chlorhexidine tolerance.** Graphs illustrate the distribution of chlorhexidine MIC (top panel) and MBC (bottom panel) values in the Australian clade. Boxplot features represent the population median (central black line), upper and lower quartiles (box), and range (bars) excluding outliers (circles). Boxplots representing SVs are coloured to reflect a plasmid structural feature: extra-chromosomal plasmid (teal), and chromosomally integrated with either an internal *repA* deletion (light blue) or a multi-CDS plasmid backbone (R1) deletion (dark blue).

Figure 5

bioRxiv preprint doi: <https://doi.org/10.1101/457838>; this version posted October 31, 2018. The copyright holder for this preprint (which was not certified by peer review) is the author/funder, who has granted bioRxiv a license to display the preprint in perpetuity. It is made available under aCC-BY-ND 4.0 International license.

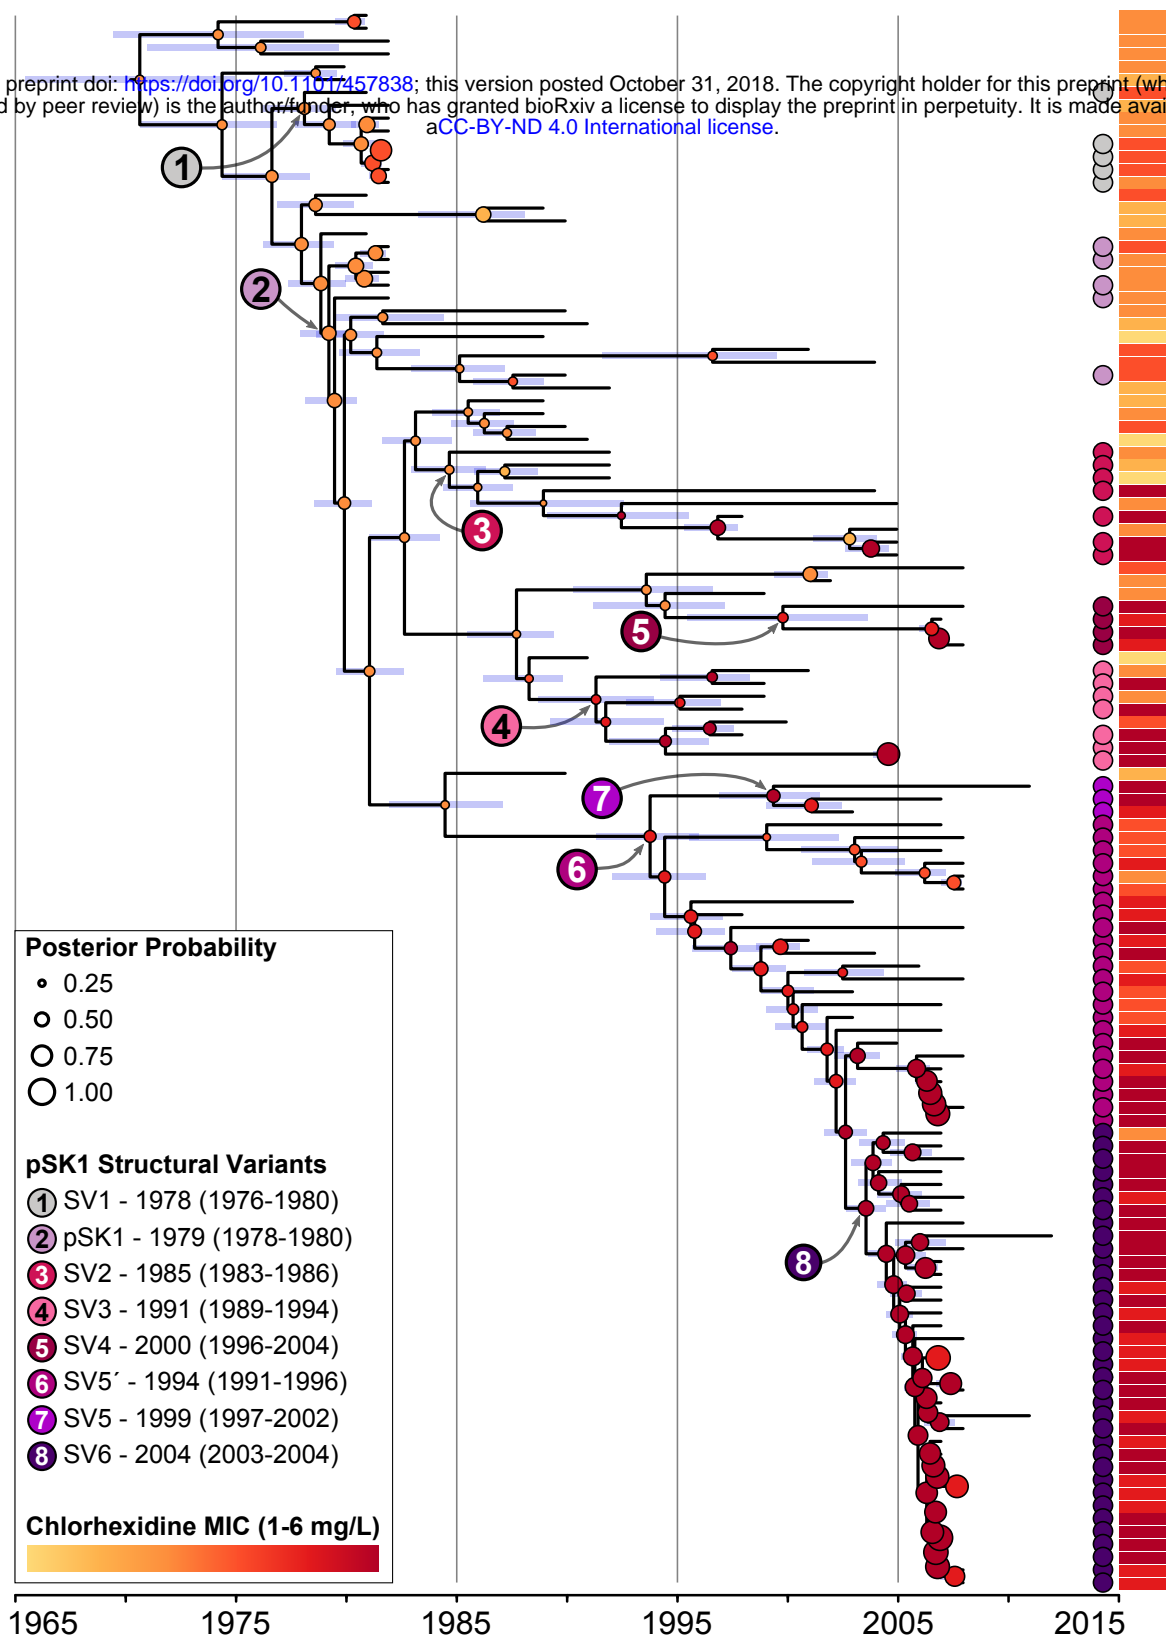

**Figure 5. Bayesian phylogenetic model associating chlorhexidine tolerance with pSK1-like plasmid evolution.** Illustrated is a maximum clade credibility tree inferred from the whole genome alignment of the Australian clade (n=124). Isolates identified as harbouring a pSK1-like plasmid are indicated by a circle located adjacent to the tree and coloured based on the SV identified. The ancestral nodes in which each SV is estimated to have emerged are indicated by a number (refer to key), those coloured black represent an extra-chromosomal plasmid and those coloured white represent a genomic island. The estimated CHX MIC for all ancestral nodes is indicated by a circle, coloured based on the MIC value and sized according to the posterior probability for the estimate (refer to key). Blue bars represent the 95% highest posterior density interval for the node heights. The aligned heatmap illustrates the phenotypic MIC values attained for each isolate.
